# Supplementary material for: Synthesis of a tetranitrosyl iron complex with unique structure and properties as an inhibitor of phosphodiesterases
Source: Royal Society of Chemistry journal article supplement (doi:10.1039/d3dt03104g), 2023-01-01
Supplement: d3dt03104g1.pdf [file d3dt03104g1.pdf]

## Supplementary materials

# Synthesis, a unique structure and properties of tetranitrosyl iron complex, the inhibitor of phosphodiesterase 1

Nataliya A. Sanina<sup>a,b,c</sup>, Andrey N. Utenyshev<sup>a</sup>, Pavel V. Dorovatovskii<sup>d</sup>, N.S. Emel'yanova<sup>a</sup>,  
Nickolai S. Ovanesyan<sup>a</sup>, Alexander V. Kulikov<sup>a</sup>, Il'ya V. Sulimenkov<sup>f</sup>, Viktor B. Luzhkov<sup>a</sup>,  
Olesya V. Pokidova<sup>a</sup>, Sergey M. Aldoshin<sup>a</sup>

<sup>a</sup>*Federal Research Center of Problems of Chemical Physics and Medicine Chemistry, Russian Academy of Sciences, 1 Acad. Semenov Av., Chernogolovka, 142432, Russia*

<sup>b</sup>*M.V. Lomonosov Moscow State University, 119991, Moscow, Russia*

<sup>c</sup>*Federal State University of Education, 141014, Mytishchi, Russia*

<sup>d</sup>*National Research Center "Kurchatov Institute", 123182, Moscow, Russia*

<sup>f</sup>*Chernogolovka Branch of N.N. Semenov Federal Research Center for Chemical Physics, Russian Academy of Sciences, Academician Semenov avenue 1/10, Chernogolovka, 142432, Moscow region, Russia*

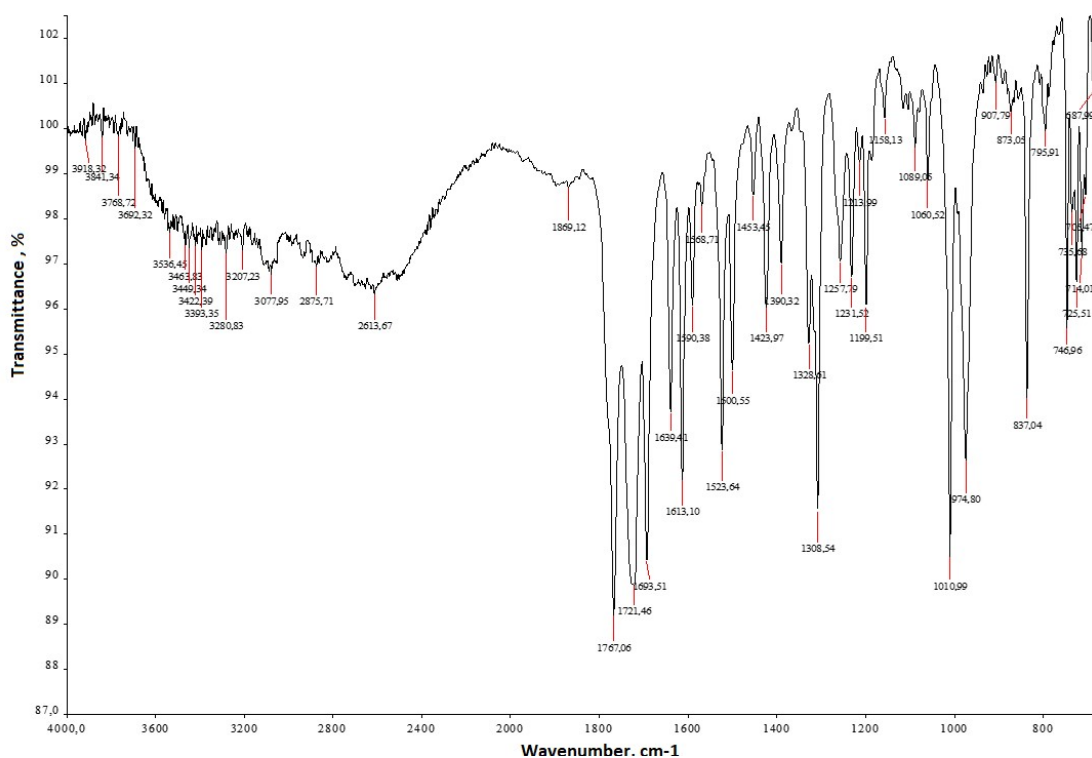

Fig. S1. IR spectrum of complex 1.

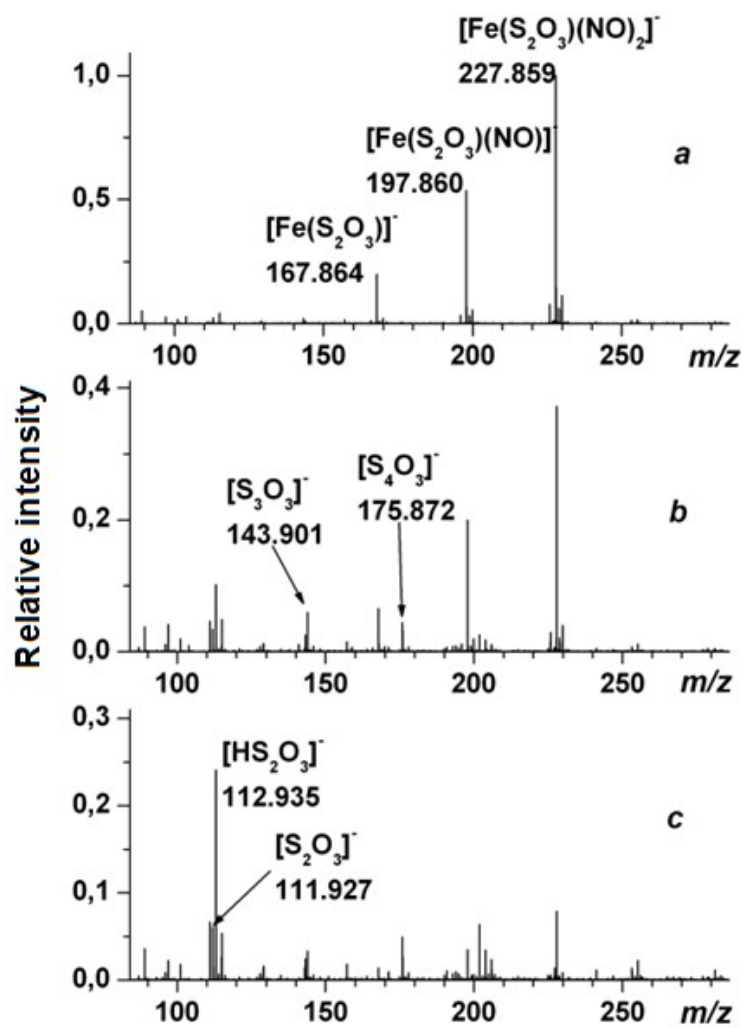

Fig.S2. Mass spectra of  $\text{Na}_2[\text{Fe}_2(\text{S}_2\text{O}_3)_2(\text{NO})_4] \cdot 4\text{H}_2\text{O}$  ( $10^{-4}$  M) aqueous solution: 4 (a), 24 (b) and 64 (c) minutes after preparing of the solution (from ref. [48]).

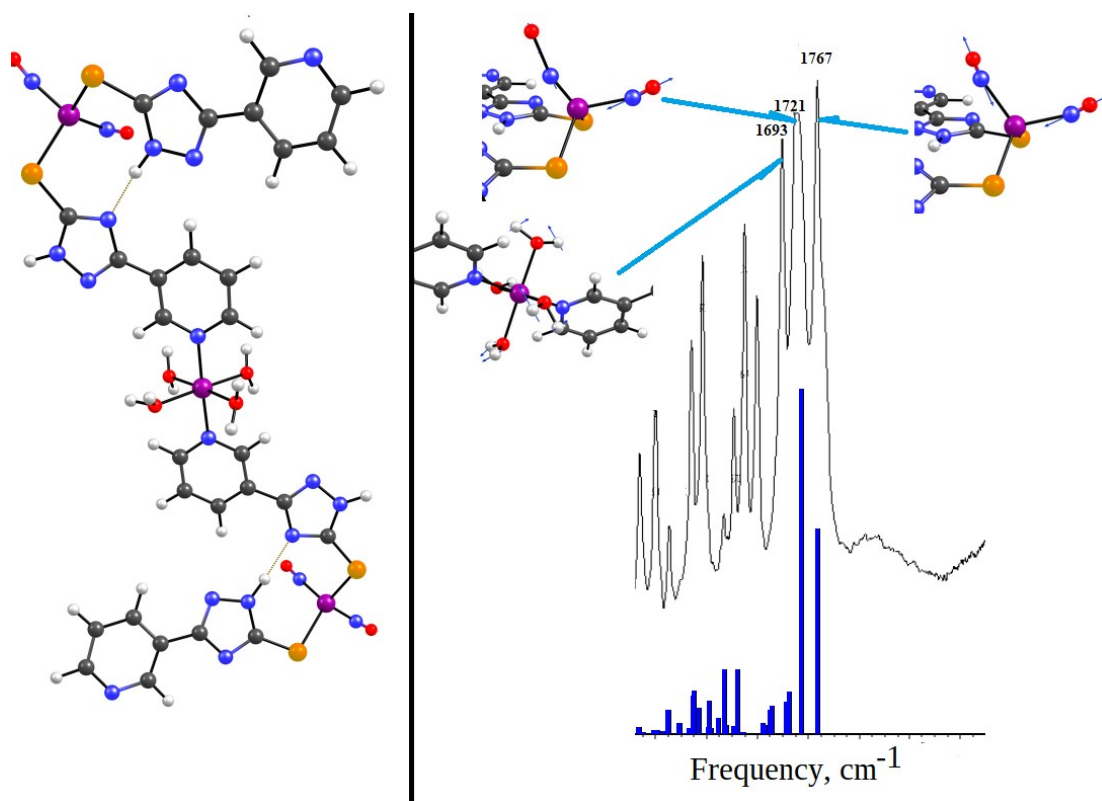

Fig.S3. Optimized geometry (Tpssh/6-31G\*) and comparison of theoretical and experimental IR spectra of complex 1.

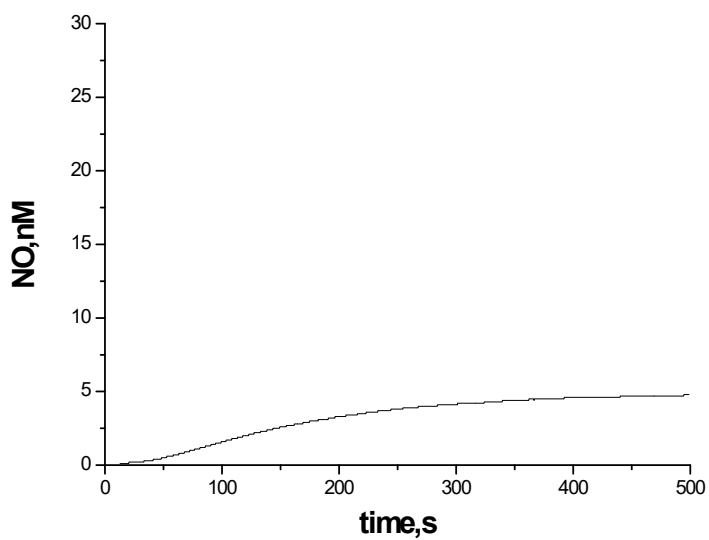

Fig. S4. Time dependence of the amount of NO generated by complex 2 ( $0.4 \cdot 10^{-5}$  M) in a 1% aqueous solution of DMSO at pH 7.0 and  $T=25^{\circ}\text{C}$  under aerobic conditions.

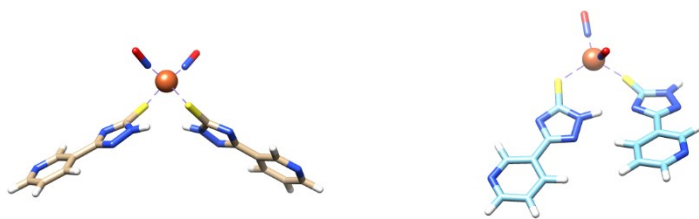

c1

c2

Fig. S5. Conformations of complex 2.

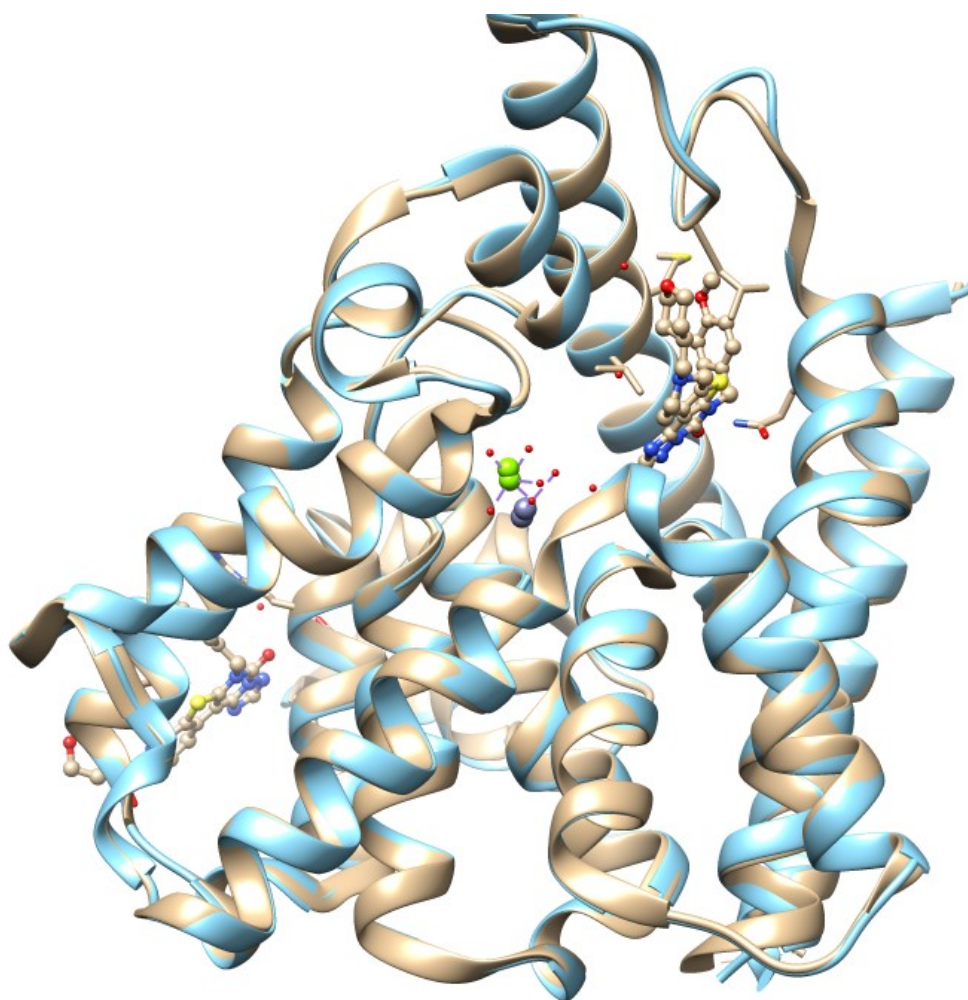

Fig. S6. Overlay of the 3D structures of the human phosphodiesterase 5uoy.pdb (yellow) and bovine model PDE1B (blue). The 8HM ligands in 5uoy.pdb are shown as ball-and-stick models.
